# Supplementary material for: The Misconception of Antibiotic Equal to an Anti-Inflammatory Drug Promoting Antibiotic Misuse among Chinese University Students
Source: Int J Environ Res Public Health. 2019 Jan 25;16(3):335. doi: 10.3390/ijerph16030335 (PMC6388115; doi:10.3390/ijerph16030335)
Supplement: Supplementary File 1 [file ijerph-16-00335-s001.pdf]

# Questionnaire of antibiotic use among Chinese university students

## Part 1: The General Information

1. Your university:  
☐ Zhejiang University; ☐ Wuhan University; ☐ Tianjin University;  
☐ Jilin University; ☐ Lanzhou University; ☐ Guizhou University;
2. Your date of birth: Year \_\_\_\_\_ Month \_\_\_\_\_
3. Your gender:  
☐ male ☐ female
4. Your education level:  
☐ undergraduate student; ☐ master student; ☐ Ph.D. student
5. Your grade: \_\_\_\_\_
6. Your major:  
☐ science ☐ social science and humanity ☐ medicine
7. Your father's education level:  
☐ illiteracy and primary school ☐ middle school ☐ high school  
☐ junior college ☐ undergraduate and higher
8. Your mother's education level:  
☐ illiteracy and primary school ☐ middle school ☐ high school  
☐ junior college ☐ undergraduate and higher
9. Does your father have a medical background?  
☐ yes ☐ no
10. Does your mother have a medical background?  
☐ yes ☐ no
11. Your household income per month (RMB) in the past year?  
☐ <3,000 ☐ 3,001-10,000 ☐ 10,001-20,000 ☐ >20,000
12. Please tell us the province of your hometown: \_\_\_\_\_
13. Please tell us your residence in your hometown: ☐ rural ☐ urban

## Part 2: Antibiotic Use Misconception

14. Antibiotic is a *Xiaoyanyao*.  
☐ yes ☐ no ☐ do not know

## Part 3: Antibiotic Use Behaviors

**Please read the following messages before you start the next part of the survey.**

Antibiotics are not anti-inflammatory drugs. Common-used antibiotics include:

- Penicillin (amoxicillin, etc.)
- Cephalosporin (cefaclor, ceftriaxone sodium, etc.)
- Quinolones (norfloxacin, ofloxacin, etc.)
- Macrolides (azithromycin and roxithromycin etc.)
- Sulfa

15. Did you get sick in the last month?

☐yes ☐no (skip to No.22)

16. If yes, which conditions did you get? (you can choose more than one answer)

☐sore throat ☐common cold (cough, runny nose) ☐headache ☐otitis media  
☐flu ☐diarrhea ☐others (please specify) \_\_\_\_\_

17. What treatment did you get?

☐pure self-treatment without advice from a doctor, nurse, or dentist  
☐go to see a doctor, nurse, or dentist (skip to No.22)  
☐do nothing (skip to No.22)

18. If it is pure self-treatment, did you use antibiotics?

☐yes ☐no (skip to No.22)

19. If yes, please tell us the name of antibiotics \_\_\_\_\_

20. If you went to see a doctor, nurse, or dentist, which type of health facilities did you choose?

☐private clinic ☐community health service center/station  
☐county level hospital ☐county level above hospital

21. If you went to see a doctor, nurse, or dentist, did you get antibiotics?

☐yes, please tell us the antibiotic name \_\_\_\_\_  
☐no (skip to No.22)

22. Did you take a request to obtain antibiotics (or get infusion) from doctors in the past year?

☐yes ☐no

23. Did you take antibiotics to prevent diseases (such as colds, flu etc.) without advice from a doctor, nurse, or dentist in the past year?

☐yes ☐no
